# Supplementary material for: Macro-level Modeling of the Response of C. elegans Reproduction to Chronic Heat Stress
Source: PLOS journal article supplement (doi:10.1371/journal.pcbi.1002338), 2012-01-26
Supplement: S5 (10.1371/journal.pcbi.1002338.s005) [file journal.pcbi.1002338.s005.pdf › journal.pcbi.1002338.s005.pdf]

Table S1: Summary of experiments performed to assess the effect of chronic temperature change on motility and viability.

| Temperature (°C) | Independent Experiments | Nematodes Assayed |
|------------------|-------------------------|-------------------|
| 20               | 7                       | 2,243             |
| 30               | 2                       | 1,306             |
| 31               | 3                       | 2,830             |
|                  | <b>12</b>               | <b>6,379</b>      |
