# Supplementary material for: Macro-level Modeling of the Response of C. elegans Reproduction to Chronic Heat Stress
Source: PLOS journal article supplement (doi:10.1371/journal.pcbi.1002338), 2012-01-26
Supplement: S6 (10.1371/journal.pcbi.1002338.s006) [file journal.pcbi.1002338.s006.pdf › journal.pcbi.1002338.s006.pdf]

Table S2: Summary of experiments performed with mutant *C. elegans* strains.

| Strain          | Temperature (°C) | Independent Experiments | Nemotodes Assayed | Eggs Counted  |
|-----------------|------------------|-------------------------|-------------------|---------------|
| <i>tra-3</i>    | 20               | 2                       | 113               | 11,333        |
|                 | 25               | 2                       | 124               | 11,575        |
|                 | 28               | 4                       | 225               | 8,629         |
| <i>cdc-48.1</i> | 20               | 2                       | 129               | 10,644        |
|                 | 25               | 2                       | 97                | 4,747         |
|                 | 28               | 2                       | 97                | 2,089         |
|                 |                  | <b>14</b>               | <b>785</b>        | <b>49,017</b> |
