# Supplementary material for: Macro-level Modeling of the Response of C. elegans Reproduction to Chronic Heat Stress
Source: PLoS Comput Biol. 2012 Jan 26;8(1):e1002338. doi: 10.1371/journal.pcbi.1002338 (PMC3266876; doi:10.1371/journal.pcbi.1002338)
Supplement: Table S3 — Summary of egg retention experiments. (PDF) [file pcbi.1002338.s007.pdf]

Table S3: Summary of egg retention experiments.

| Strain          | Temperature (°C) | Nematodes Assayed | Eggs Counted  |
|-----------------|------------------|-------------------|---------------|
| N2              | 20               | 147               | 7,225         |
|                 | 25               | 39                | 3,645         |
|                 | 28               | 39                | 1,620         |
| <i>tra-3</i>    | 20               | 40                | 2,909         |
|                 | 25               | 36                | 4,014         |
|                 | 28               | 40                | 1,982         |
| <i>cdc-48.1</i> | 20               | 40                | 2,080         |
|                 | 25               | 39                | 2,499         |
|                 | 28               | 40                | 1,296         |
| <i>egl-19</i>   | 20               | 39                | 2,554         |
|                 | 25               | 39                | 2,258         |
|                 | 28               | 40                | 2,287         |
|                 |                  | <b>578</b>        | <b>34,369</b> |
